# Supplementary material for: A selective CB2R agonist (JWH133) protects against pulmonary fibrosis through inhibiting FAK/ERK/S100A4 signaling pathways
Source: Springer Nature journal article supplement (doi:10.1186/s12890-023-02747-3), 2023-11-13
Supplement: MOESM1 [file 26297242]

Figure 3 Col-I

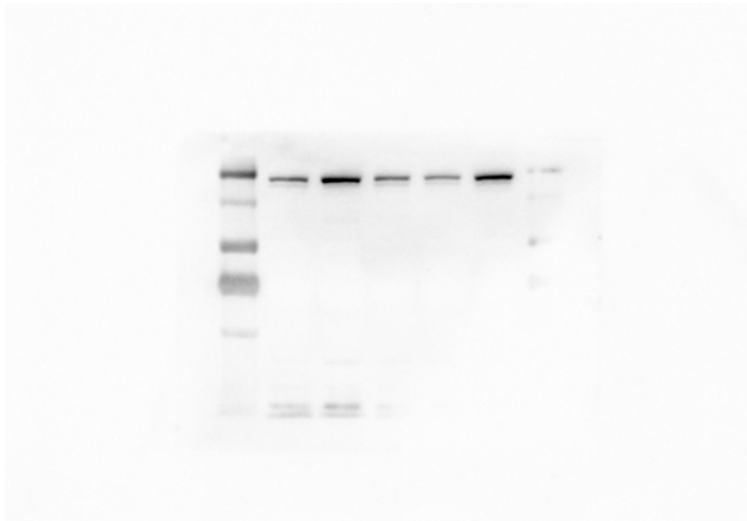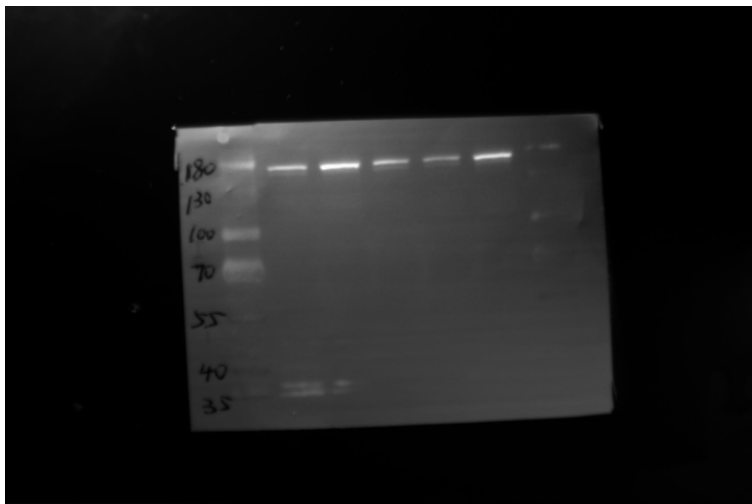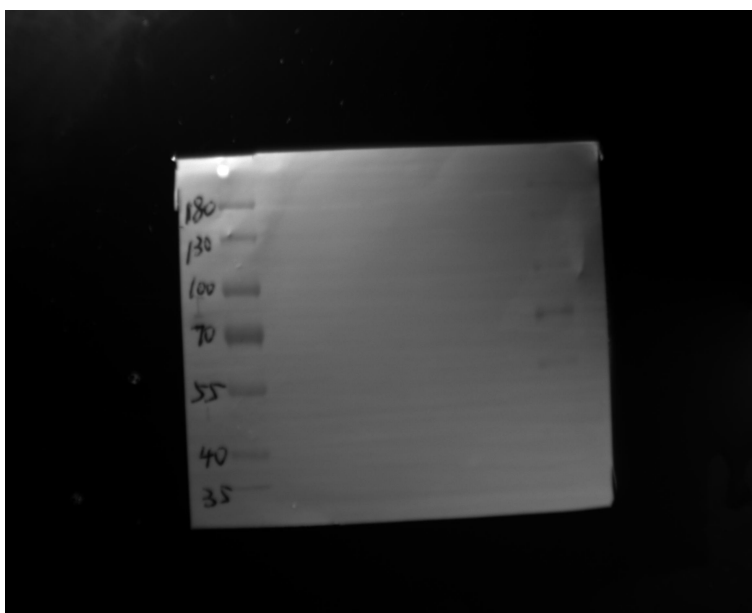

Figure 3 Col-III

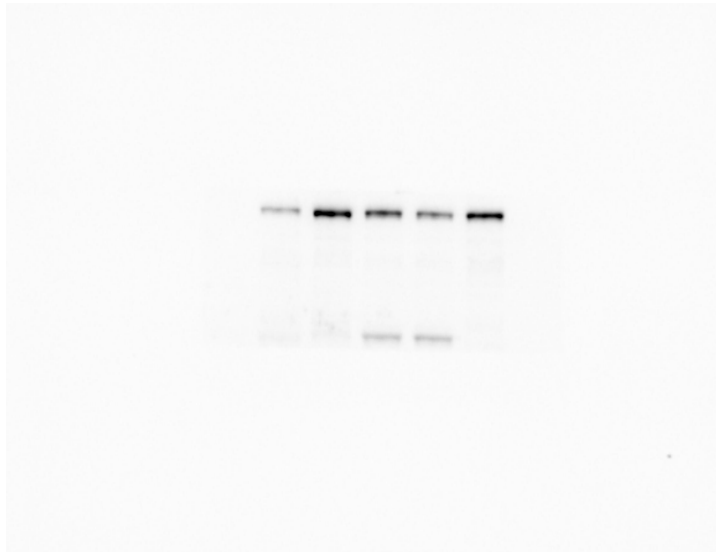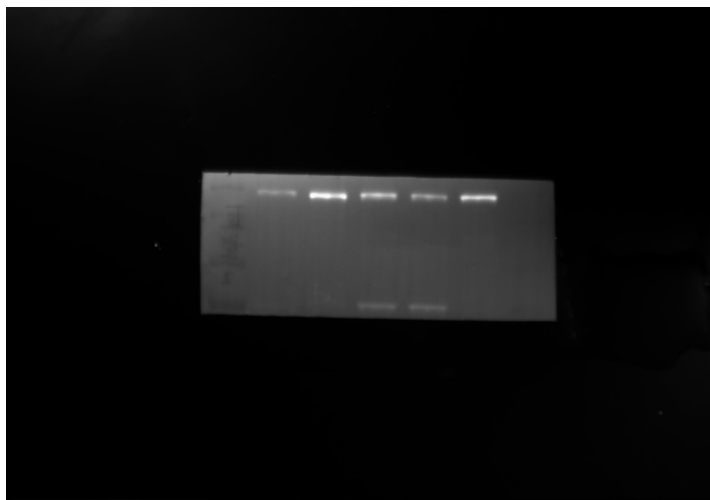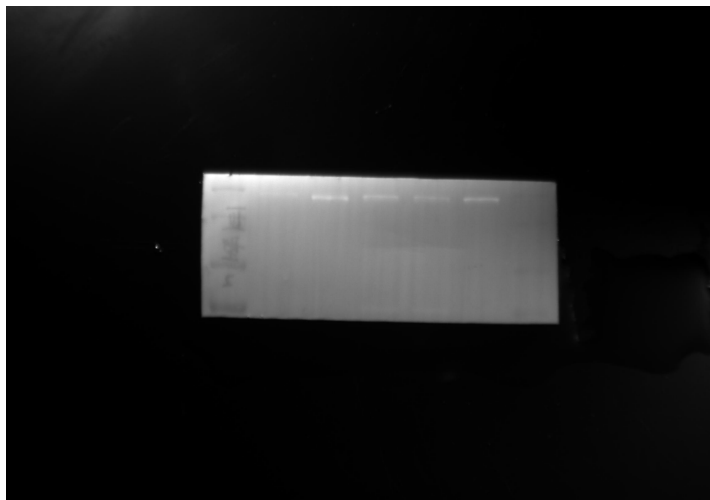

Figure 3 GAPDH

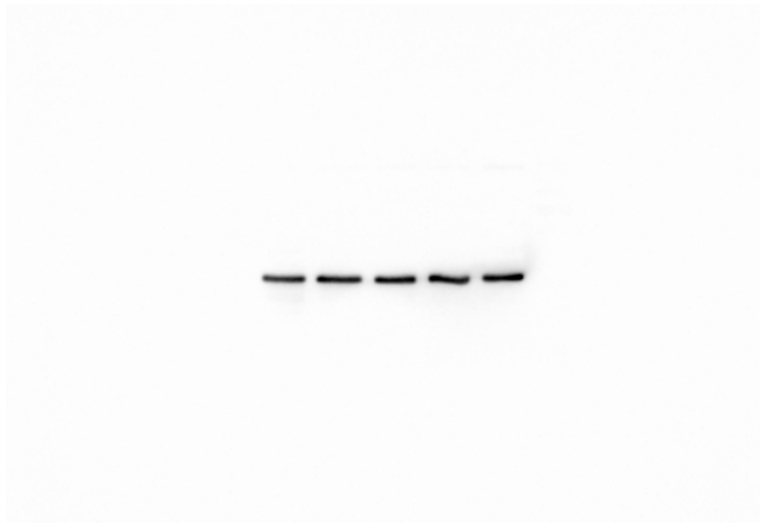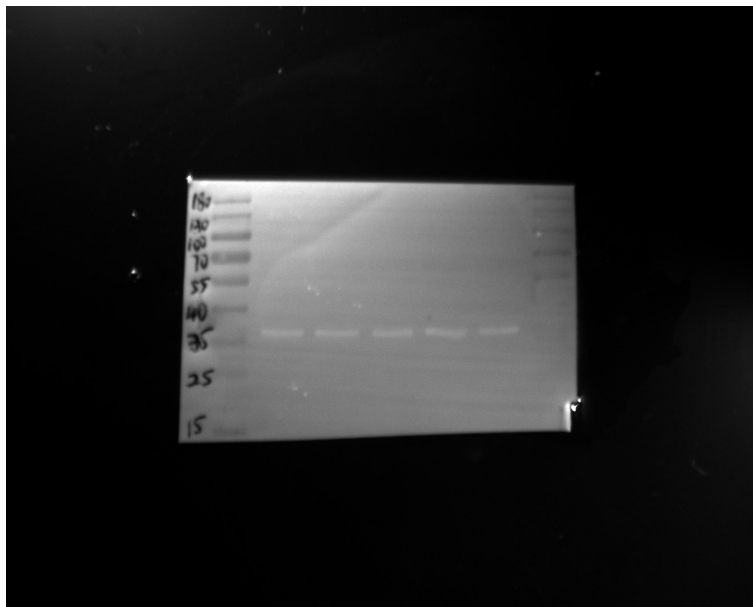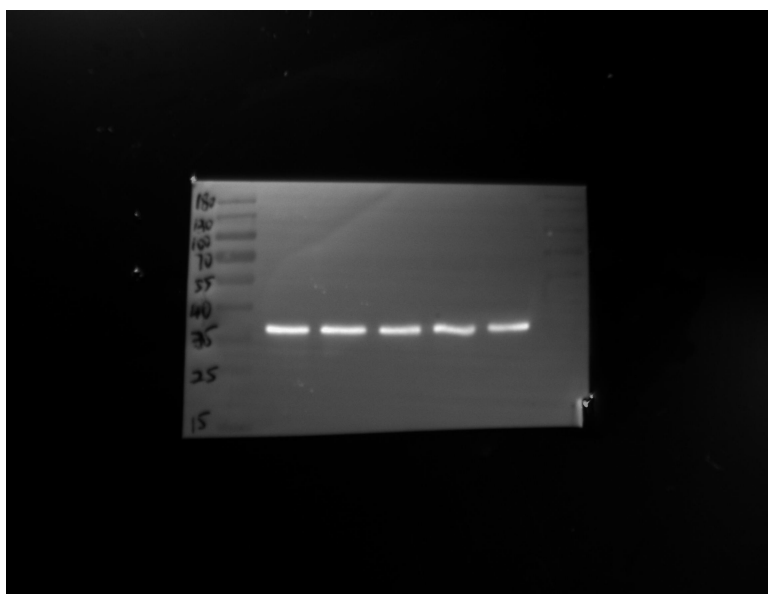

Figure 3  $\alpha$ -SMA

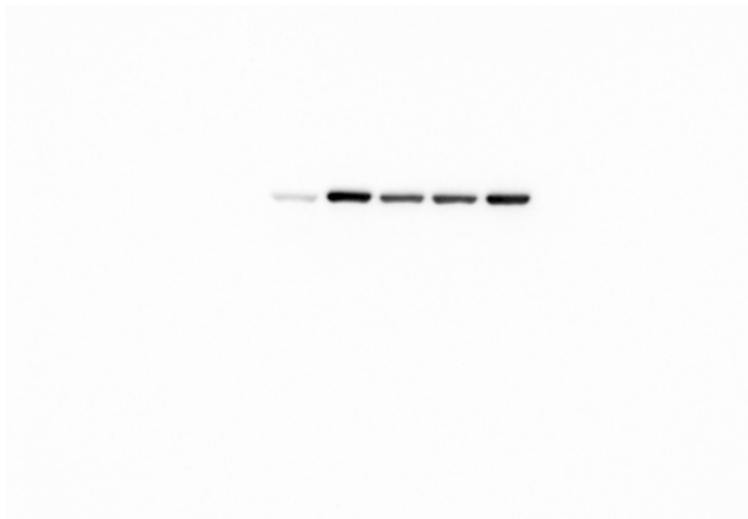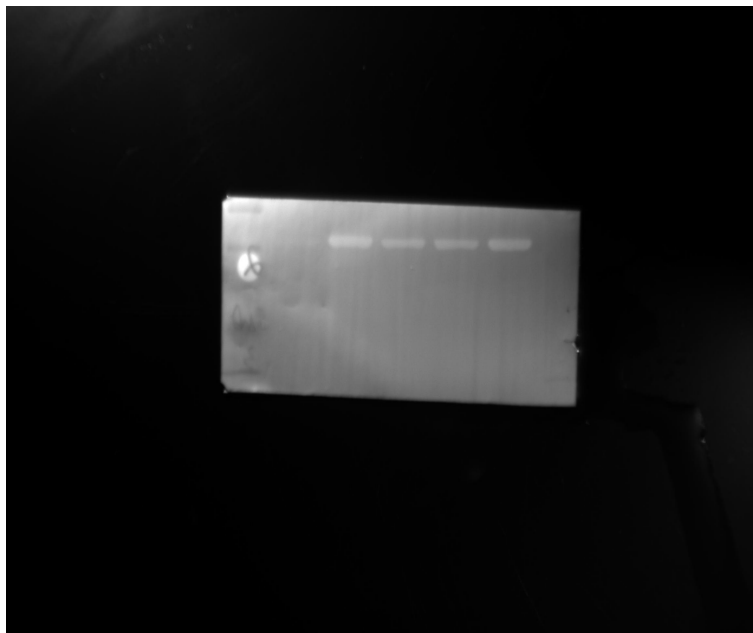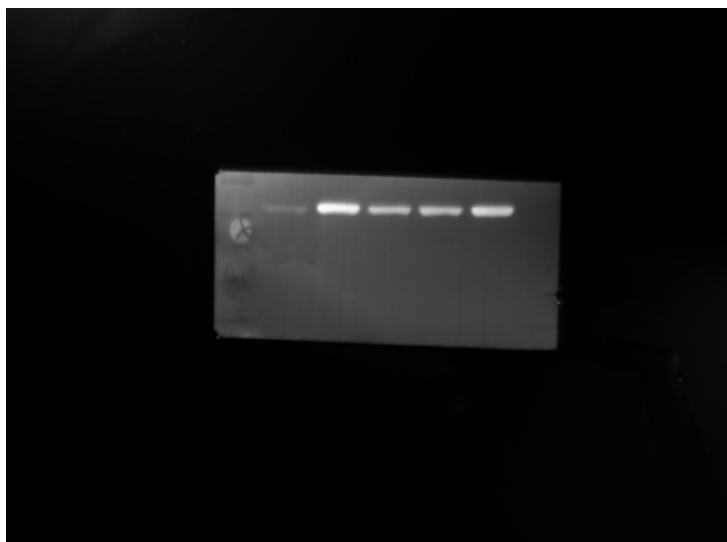

Figure 4 p-FAK

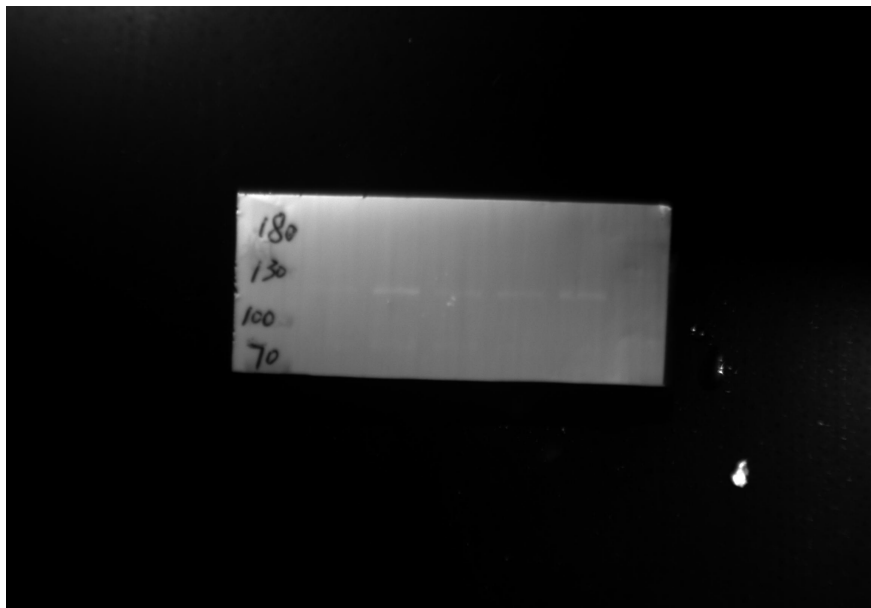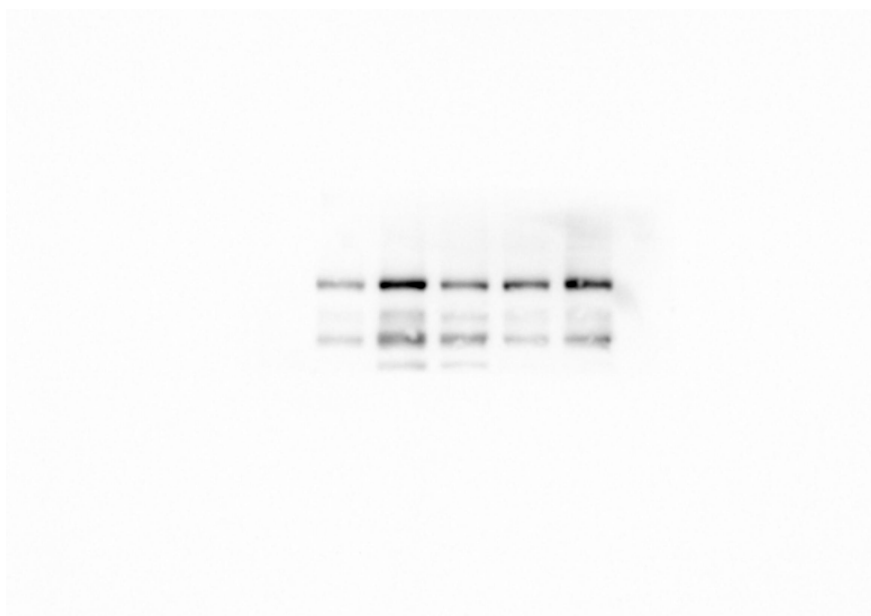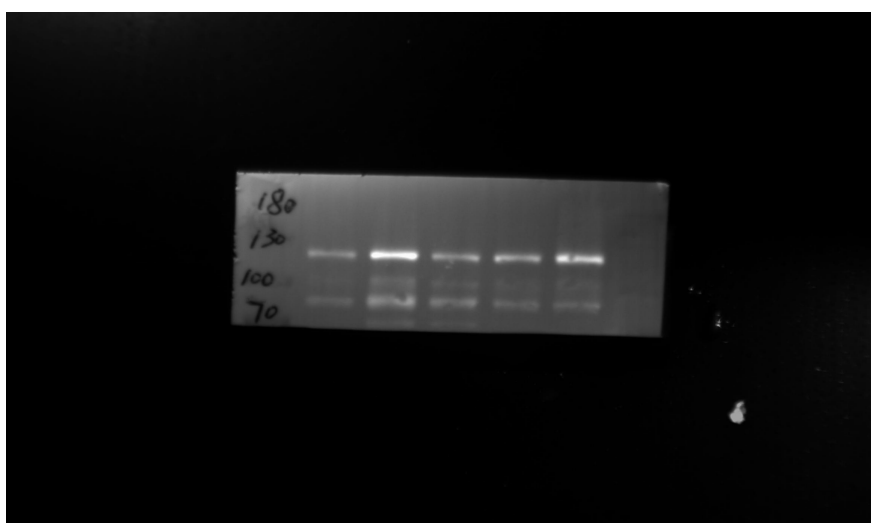

Figure 4 FAK

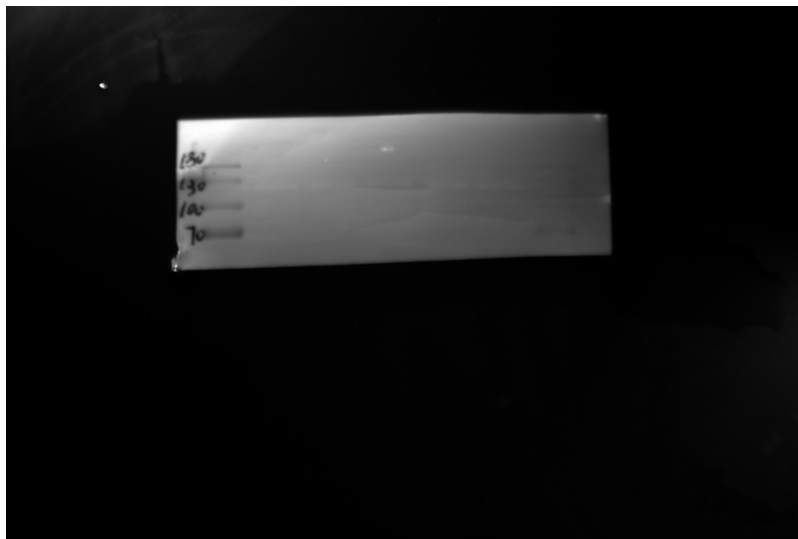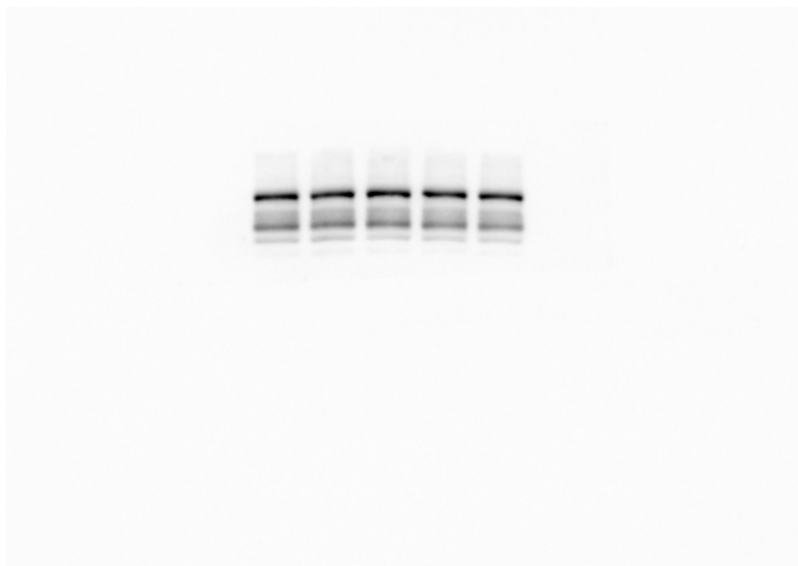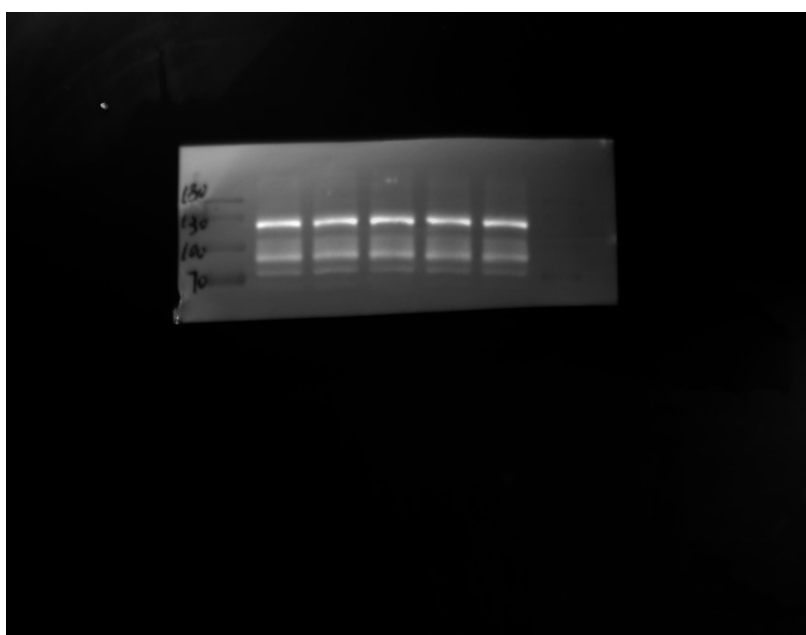

Figure 4 p-ERK

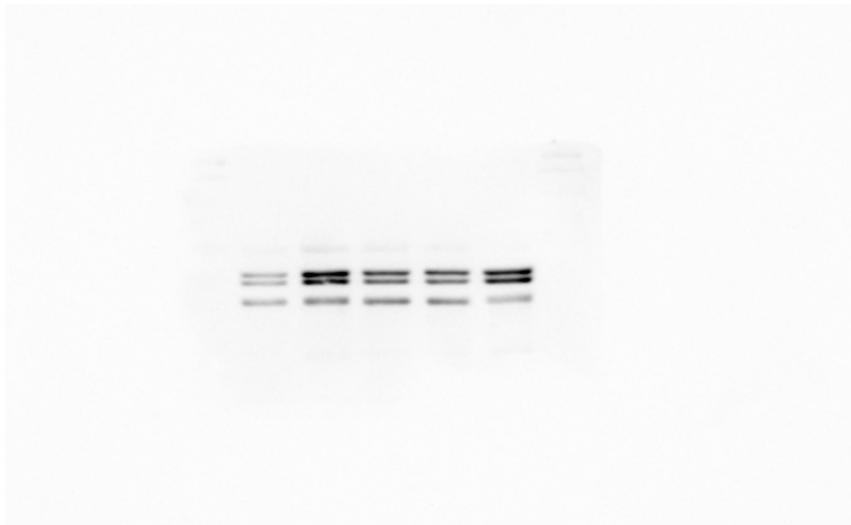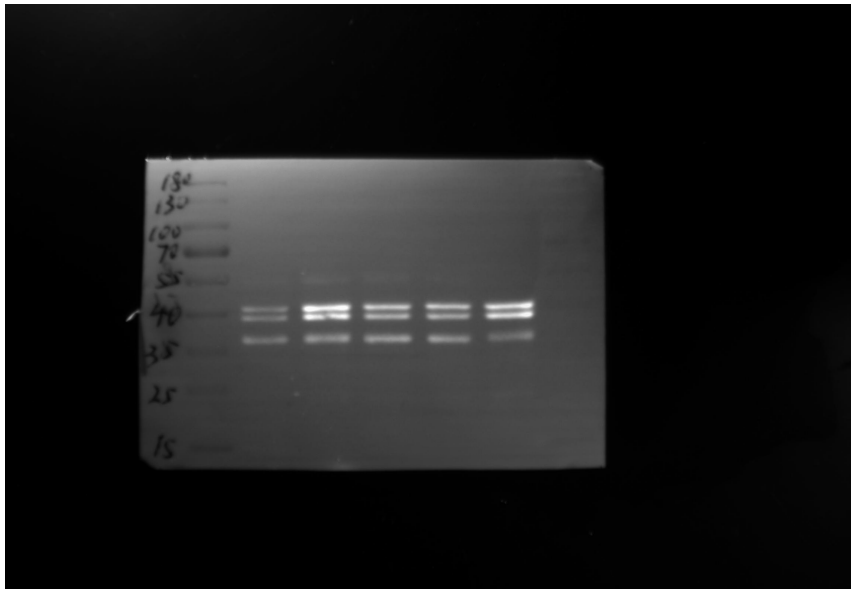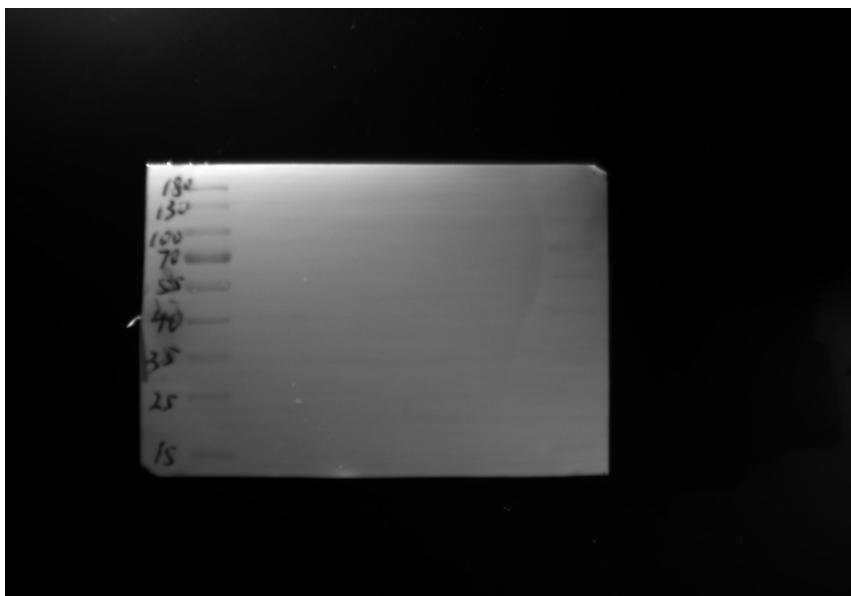

Figure 4 ERK

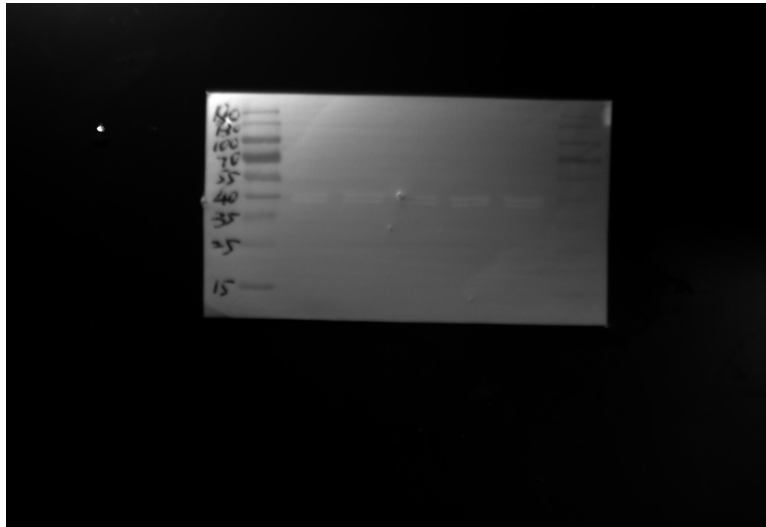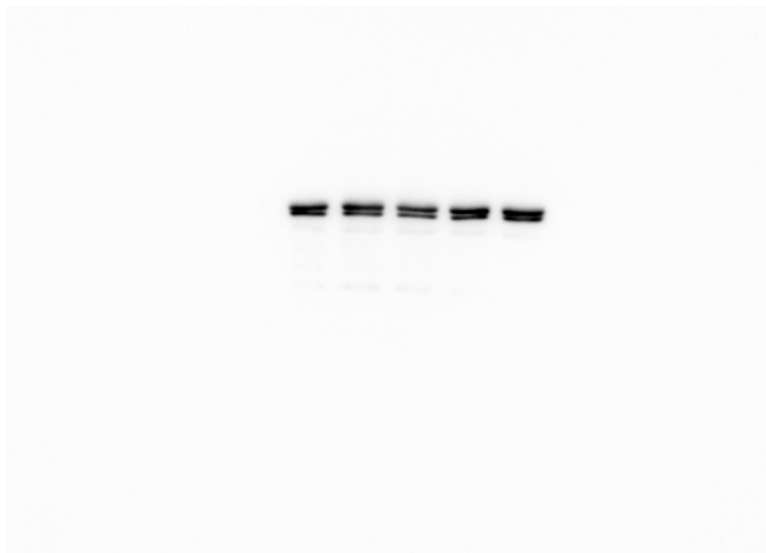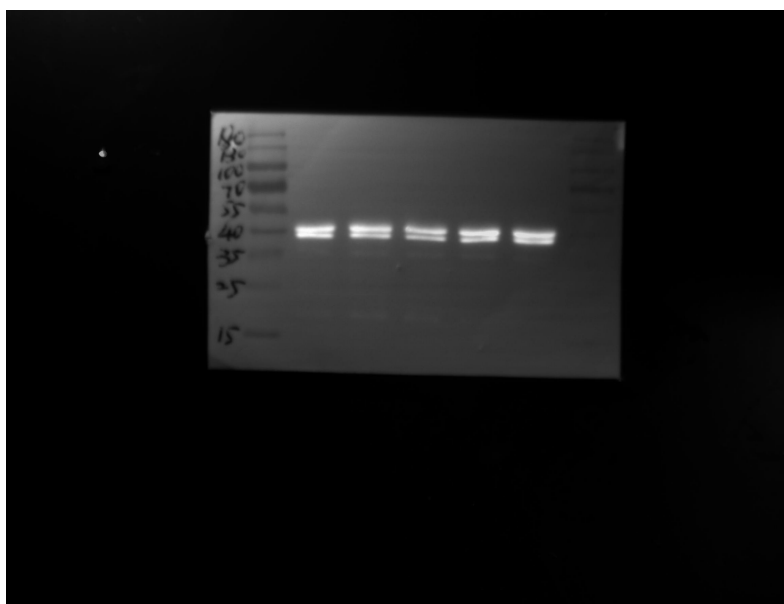



Figure 4 S100A4

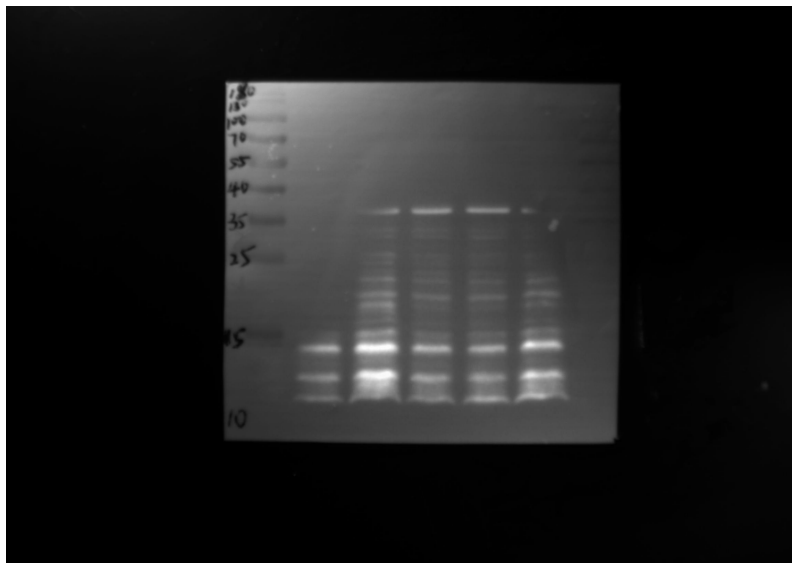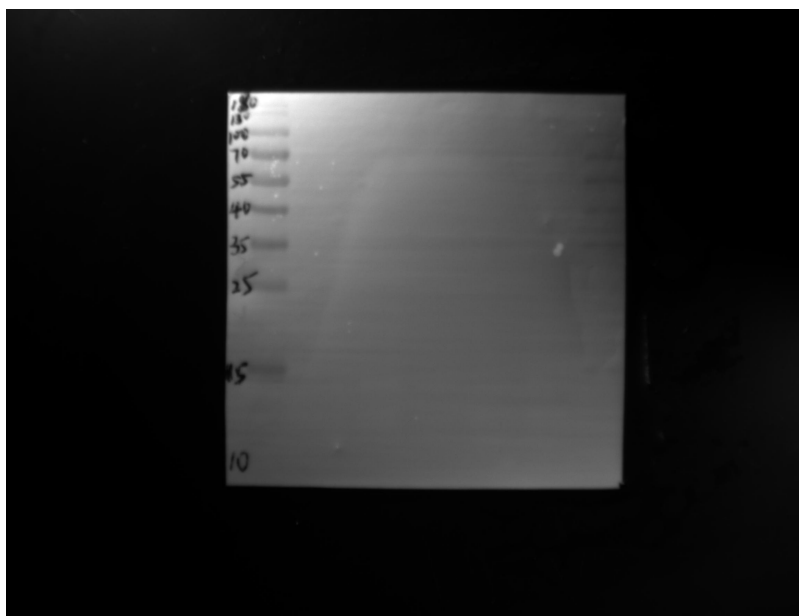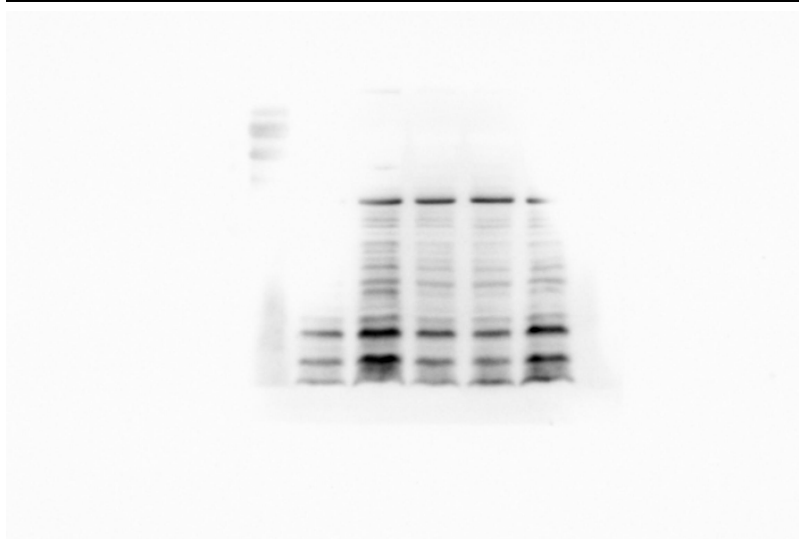

Figure 4 GAPDH

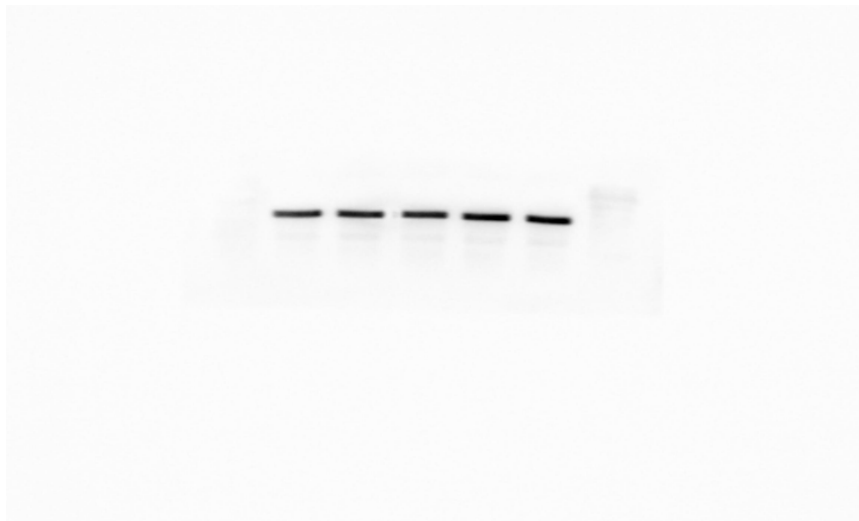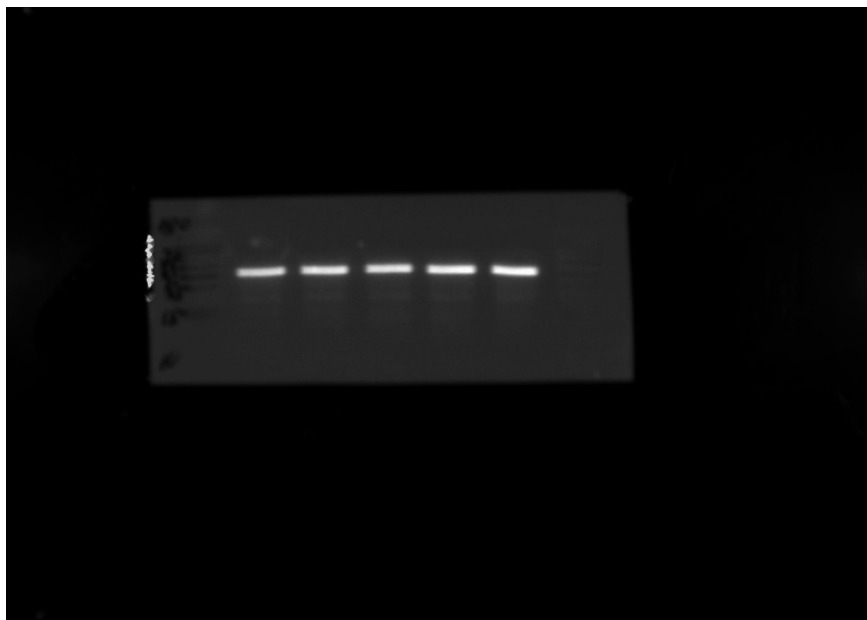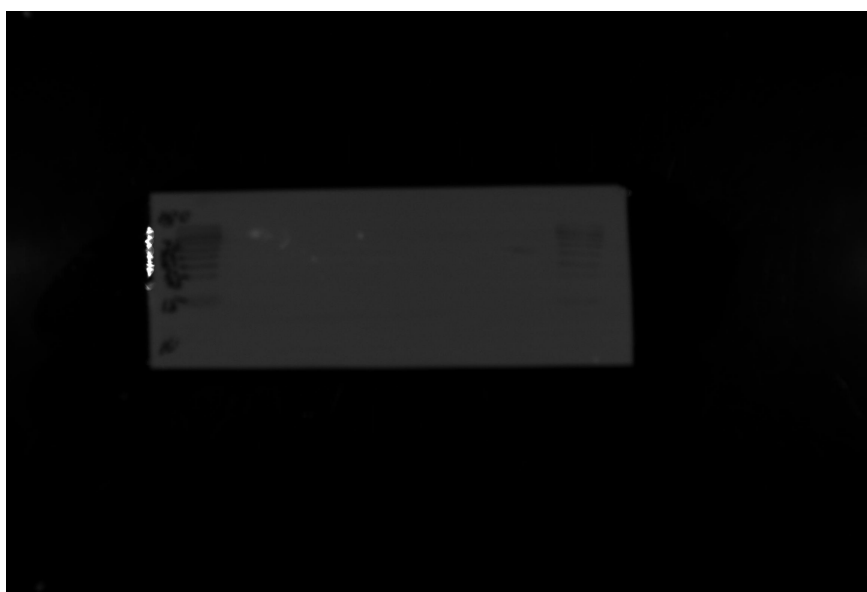

Marker Thermo Fisher

## PageRuler Prestained Protein Ladder

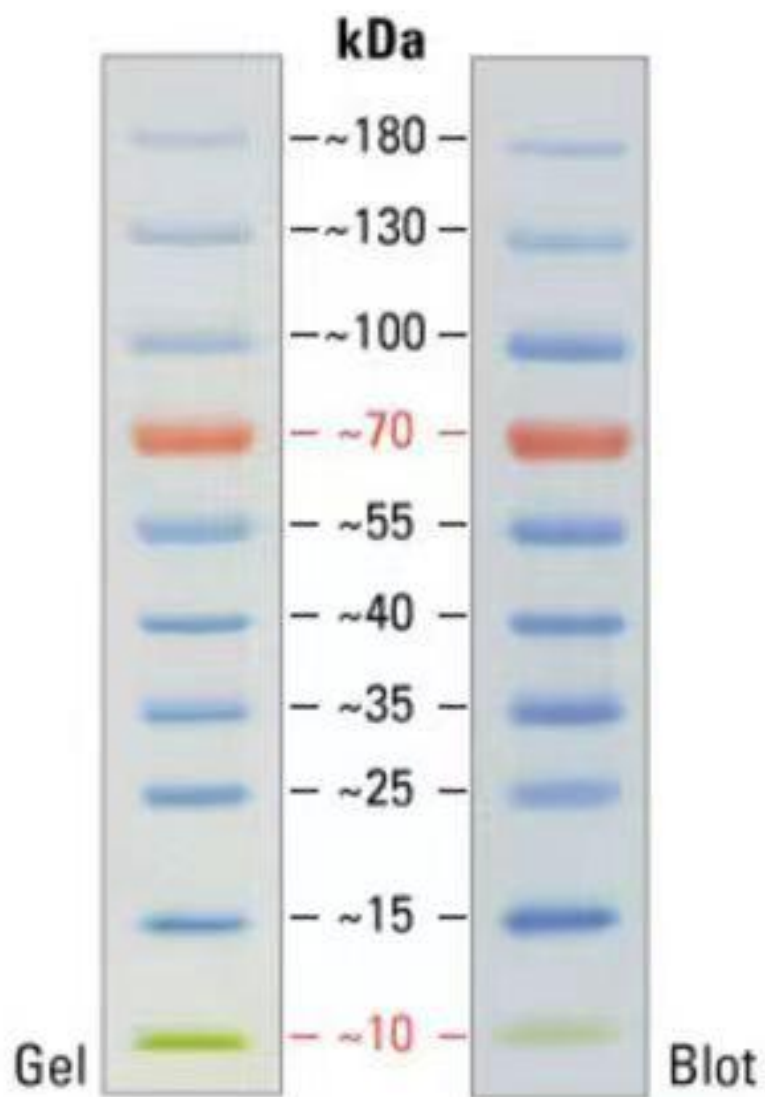

4-20% Tris-glycine SDS-PAGE
